1

## Viewpoint-Dependence and Scene Context Effects Generalize to Depth Rotated 3D Objects.

Aylin Kallmayer<sup>1</sup>, Melissa L.-H. Võ<sup>1</sup>, & Dejan Draschkow<sup>2,3</sup>

<sup>1</sup> Department of Psychology, Goethe University Frankfurt, Theodor-W.-Adorno-Platz 6, Frankfurt am Main 60323, Germany

<sup>2</sup> Department of Experimental Psychology, University of Oxford, Oxford, UK

<sup>3</sup> Oxford Centre for Human Brain Activity, Wellcome Centre for Integrative Neuroimaging, Department of Psychiatry, University of Oxford, Oxford, UK

Corresponding author contact information:

Aylin Kallmayer

Department of Psychology,

Scene Grammar Lab,

Goethe University,

Frankfurt, Germany

Phone: +491778445631

Mail: [kallmayer@psych.uni-frankfurt.de](mailto:kallmayer@psych.uni-frankfurt.de)

**Keywords:** Object recognition, Viewpoint dependence, Scene context effects

## Abstract

Viewpoint effects on object recognition interact with object-scene consistency effects. While recognition of objects seen from “accidental” viewpoints (e.g., a cup from below) is typically impeded compared to processing of objects seen from canonical viewpoints (e.g., the string-side of a guitar), this effect is reduced by meaningful scene context information. In the present study we investigated if these findings established by using photographic images, generalise to 3D models of objects. Using 3D models further allowed us to probe a broad range of viewpoints and empirically establish accidental and canonical viewpoints. In Experiment 1, we presented 3D models of objects from six different viewpoints (0°, 60°, 120°, 180°, 240°, 300°) in colour (1a) and grayscale (1b) in a sequential matching task. Viewpoint had a significant effect on accuracy and response times. Based on the performance in Experiments 1a and 1b, we determined canonical (0°-rotation) and non-canonical (120°-rotation) viewpoints for the stimuli. In Experiment 2, participants again performed a sequential matching task, however now the objects were paired with scene backgrounds which could be either consistent (e.g., a cup in the kitchen) or inconsistent (e.g., a guitar in the bathroom) to the object. Viewpoint interacted significantly with scene consistency in that object recognition was less affected by viewpoint when consistent scene information was provided, compared to inconsistent information. Our results show that viewpoint-dependence and scene context effects generalize to depth rotated 3D objects. This supports the important role object-scene processing plays for object constancy.

## 1 **Introduction**

2 Object recognition happens fast, automatic, and in most cases seems effortless to us. Since our  
3 environment is highly dynamic, especially when interacting with it, one and the same object  
4 will produce a range of different images on the retina. In fact, it is very unlikely that an object  
5 would produce the same retinal image twice due to changes in viewpoint, lighting, reflections,  
6 or viewing distance. Still, our visual system is able to flexibly transform this variable visual  
7 input in a way that object identity can successfully be read out from the resulting abstract  
8 representations in higher areas of visual cortex (see DiCarlo & Cox, 2007).

9 Whether object recognition is viewpoint-dependent (recognition performance is  
10 sensitive to changes in viewpoints as indicated by accuracy and response-time (RT) data) or  
11 viewpoint-invariant (recognition performance is largely unaffected by changes in viewpoint)  
12 has been a debated topic (Biederman & Gerhardstein, 1993; Bühlhoff & Edelman, 1992;  
13 Burgund & Marsolek, 2000; Charles Leek & Johnston, 2006; Edelman, 1995; Graf, 2006;  
14 Hayward, 2003; Hayward & Tarr, 1997; Jolicoeur, 1990; Leek et al., 2007; Lowe, 1987; Marr  
15 et al., 1978; Ratan Murty & Arun, 2015; Stankiewicz, 2002; Tarr & Bühlhoff, 1995; Tarr &  
16 Pinker, 1989; Wilson & Farah, 2003). Since the early debates, there has been overwhelming  
17 consensus that object recognition is neither solely viewpoint-dependent nor solely viewpoint-  
18 invariant and that evidence for both can be observed depending on experimental task and  
19 stimuli (Foster & Gilson, 2002; Hamm & McMullen, 1998; Jolicoeur, 1990; Leek et al., 2007;  
20 Ratan Murty & Arun, 2015; Sastuin et al., 2015; Stankiewicz, 2002; Vanrie et al., 2002).

21 Past research has made great advances towards understanding the mechanisms that  
22 underly invariant object recognition, when objects are presented in isolation (i.e., DiCarlo &  
23 Cox, 2007). More recently, however, researchers have started to investigate the viewpoint  
24 problem in the context of object-scene processing. Object recognition rarely occurs in isolation  
25 where the only available information are the objects' features. In our everyday lives, we

26 encounter objects within certain contexts, which provides us with a pool of complex visual and  
27 multimodal information that is integrated during object recognition. Past research has shown  
28 that context facilitates object recognition (Biederman et al., 1982; Oliva & Torralba, 2007; for  
29 a recent review see Lauer et al., 2021). Evidence from behavioral as well as neurophysiological  
30 studies (e.g., Brandman & Peelen, 2017) suggest an interactive processing of objects and  
31 scenes. For instance, objects placed in semantically consistent contexts are recognized faster  
32 and more accurately, often referred to as the *scene-consistency effect* (Davenport & Potter,  
33 2004; Palmer, 1975). Accordingly, models of object recognition have been updated to  
34 incorporate the integration of contextual information (Bar, 2004). Further, frameworks  
35 incorporating object-scene and object-object relations (e.g., the so-called *scene-grammar*)  
36 describe a set of internalized rules based on regularities found in real-world scenes that  
37 facilitate scene and object perception and guide our attention during different visual cognitive  
38 tasks (Draschkow & Võ, 2017; Josephs et al., 2016; Võ, 2021; Võ et al., 2019; Võ &  
39 Henderson, 2009; Võ & Wolfe, 2013a, 2013b).

40 Sastyin and colleagues (2015) conducted a series of experiments investigating the  
41 interaction between viewpoint and scene-consistency on object and scene recognition. They  
42 used photographic images of objects shown from canonical and accidental viewpoints and  
43 paired them with consistent or inconsistent scenes. They found a significant interaction  
44 between viewpoint and consistency where the viewpoint effect was weaker when consistent  
45 scene information was provided. From this they concluded that object recognition relied more  
46 on context information if the object was presented from an accidental viewpoint.

47 Here, in order to increase the external validity of these findings (Draschkow, 2022),  
48 we aimed to generalize the insights from 2D photographic images to 3D models of objects  
49 (Biederman & Gerhardstein, 1993; Gauthier et al., 2002; Logothetis et al., 1994; Poggio &  
50 Edelman, 1990; Zisserman et al., 1995). Recent work using 3D immersive environments has

51 highlighted the importance of studying vision under more naturalistic constraints in order to  
52 investigate cognitive processes in the context of natural behavior (Draschkow et al., 2021;  
53 Helbing et al., 2020, 2022; Kristjánsson & Draschkow, 2021). An additional benefit of using  
54 3D models is that we could probe a broad range of viewpoints and empirically establish  
55 accidental and canonical viewpoints, allowing for a broader representation of the viewpoints  
56 we encounter in our natural environment.

57 In the present study, we conducted three behavioral experiments. In our first two  
58 experiments, (Experiment 1a and 1b) we presented 3D models of real-world objects from six  
59 different angles (0°, 60°, 180°, 120°, 240°, 300°) rotated around the pitch axis in a word-picture  
60 verification task. Because rotating the objects around the pitch axis results in highly atypical  
61 viewpoints, we expected to find viewpoint-dependent recognition indicated by lower accuracy  
62 and slower RTs. In Experiment 1b, we wanted to replicate Experiment 1a with grayscale  
63 versions of the images, expecting similar effects of viewpoint as for Experiment 1a (Hayward  
64 & Williams, 2000). Experiments 1a and 1b also served to identify viewpoints which produced  
65 highest (canonical) and lowest (non-canonical) recognition performance which we then used  
66 in Experiment 2.

67 In Experiment 2, we paired 3D objects presented in canonical (0° rotation) and non-  
68 canonical (120° rotation) viewpoints with semantically consistent and inconsistent scenes. Our  
69 aim was to test if viewpoint-dependence and object-scene processing effects (Sastyin et al.,  
70 2015) generalize to depth rotated 3D models of objects.

## 71 **General Method**

### 72 **Participants**

73 Participants were recruited at Goethe-University Frankfurt am Main. The sample  
74 consisted of 12 participants who completed Experiment 1a (6 women,  $M = 23.92$ , range = 19–  
75 29), 12 different participants who completed Experiment 1b (8 women,  $M = 19$ , range = 18–

76 22), and another set of 32 participants who completed Experiment 2 (25 women,  $M = 24.28$ ,  
77 range = 18–51). The sample size of Experiment 2 was a priori chosen to be higher compared  
78 to previous studies which found reliable effects across multiple experiments with 20  
79 participants (e.g., Sastyin et al., 2015). In Experiment 1a, all except for six participants were  
80 psychology students that were compensated with course credits, while the remaining  
81 participants volunteered for the experiment without any compensation. All had normal or  
82 corrected-to-normal vision, were native German speakers, and were unfamiliar with the  
83 stimulus materials. Written informed consent was obtained before participation, data collection  
84 and analysis were carried out according to guidelines approved by the Human Research Ethics  
85 Committee of the Goethe University Frankfurt.

## 86 **Stimulus Material**

87 For Experiment 1a and Experiment 1b, we collected 100 3D models of objects from a  
88 broad range of categories such as furniture, foods, vehicles, plants, and electrical devices.  
89 Eighty-two of the 3D models were purchased from CG Axis Complete packages I, II, III, and  
90 V, 18 additional models were obtained free of charge from sources like TurboSquid and  
91 free3D. Each model was rotated around its pitch axis by 0°, 60°, 120°, 180°, 240°, and 300°  
92 degrees and sized to fit a 60cm x 60cm x 60cm box using the free 3D animation software  
93 Blender. A snapshot from each angle was systematically recorded in front of a gray background  
94 using the virtual reality software Vizard5 to create our final stimulus set of 600 images.  
95 Additionally, we created grey-scaled versions of these images for Experiment 1b using the  
96 GrayscaleEffect function in Vizard5  
97 ([https://docs.worldviz.com/vizard/latest/postprocess\\_color.htm](https://docs.worldviz.com/vizard/latest/postprocess_color.htm)).

98 For Experiment 2, we used the same 3D models as in Experiment 1 adding an additional  
99 56 models collected from the CGAxis packages, resulting in a total of 156 models. Instead of  
100 creating snapshots of all six angles, we chose the two viewpoints that had previously produced

101 the highest (canonical viewpoint, 0°) and lowest (non-canonical viewpoint, 120°) recognition  
102 performance averaged over Experiment 1a and Experiment 1b. We gray-scaled the images  
103 using the method described above.

104 Additionally, we collected 312 photographic images of scenes, one consistent and one  
105 inconsistent scene for each object. We defined a consistent scene as one in which we would  
106 expect the object to appear naturally. In both cases, the target object was not present in the  
107 scene. Most of the photographs were obtained from the SCEGRAM database (Öhlschläger &  
108 Vö, 2017) as well as from Google images.

### 109 **Procedure**

110 To investigate the speed and accuracy of object recognition, while keeping the  
111 procedure comparable with previous studies, a word-picture verification task was employed  
112 for all experiments (Figure 1). Participants were instructed on screen as well as through  
113 standardized verbal instructions to decide as quickly and accurately as possible whether the  
114 object on screen matched the basic level category label presented to them at the beginning of  
115 the trial using a corresponding “match” or “mismatch” key. Participants were not made aware  
116 of the different viewpoint conditions beforehand. Each experiment consisted of three practice  
117 trials during which the instructor stayed in the room with the participant. More detailed  
118 procedure and trial sequences will be described in the individual Procedure sections of each  
119 experiment. Experiments 1a and 1b lasted approximately 30 minutes, Experiment 2 lasted  
120 approx. 12 minutes.

121 **Figure 1.** Trial procedures for the matching task in Experiment 1a and 1b (A) and Experiment 2 (B). The object was presented  
122 in colour in Experiment 1a and greyscaled in Experiment 1b. Note that the depicted labels are in English for visualization  
123 purpose. Feedback was only provided in case of incorrect responses.

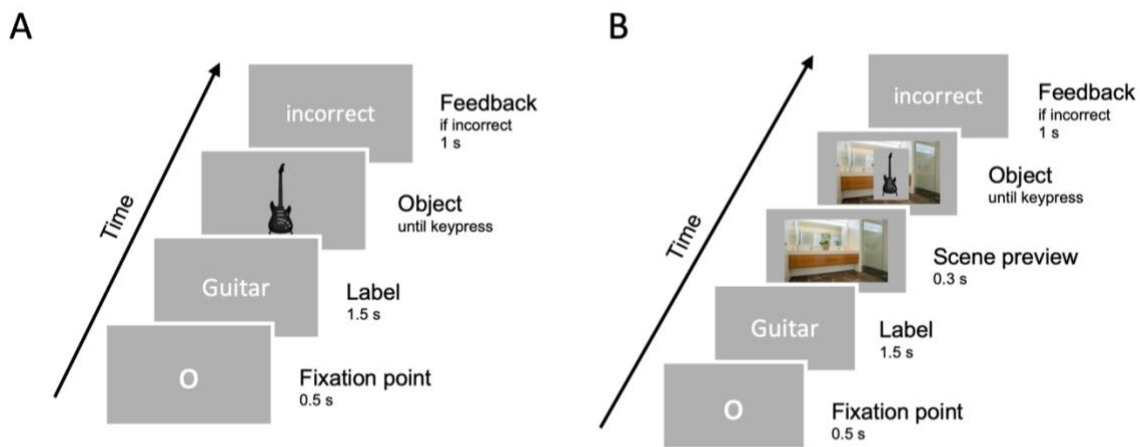

124

## 125 Design

126 Experiments 1a and 1b consisted of six blocks with 100 trials each. In each block, the  
127 object was presented from a different angle ( $0^\circ$ ,  $60^\circ$ ,  $120^\circ$ ,  $180^\circ$ ,  $240^\circ$ ,  $300^\circ$ ) chosen randomly  
128 and counterbalanced between participants. The order of objects within each block was  
129 randomized. Each object appeared three times in the match condition (object image matched  
130 basic level category label) and three times in the mismatch condition (object image did not  
131 match basic level category label), randomized between blocks.

132 In the mismatch condition, the basic level category label stemmed from a different  
133 superordinate category than the object image (e.g., the label “chair” as part of the superordinate  
134 category “furniture” was paired with an image of a “car” as part of the superordinate category  
135 “vehicle”).

136 Because there was no effect of viewpoint in the mismatch condition in Experiment 1a  
137 and 1b, most trials in Experiment 2 were match trials ( $N = 120$ ) with 23% mismatch trials ( $N$   
138  $= 36$ ) that were later excluded from analysis. In Experiment 2, each object was presented to



139 each participant once, and we counterbalanced consistency (consistent vs. inconsistent) and  
140 viewpoint (canonical vs. non-canonical) between participants.

## 141 **Data Analysis**

142 In Experiments 1a and 1b, we were interested in the effects of viewpoint (how far the  
143 object was rotated away from its canonical 0° angle) and match (whether the object matched  
144 the basic level category label as part of the experimental design) on reaction times (time  
145 between the onset of the object image and keypress response) and accuracy. In Experiment 2,  
146 we were interested in the interaction between viewpoint (canonical versus non-canonical  
147 viewpoint), and scene consistency (consistent scene versus inconsistent scene) on reaction  
148 times and accuracy.

149 Raw data was pre-processed and analysed using R (R Core Team, 2021). Objects that  
150 produced accuracy ratings that deviated more than 2.5 SD from the mean (computed for each  
151 condition separately) were excluded from analysis. Based on this, we excluded four objects in  
152 Experiment 1a, one in Experiment 1b, and two in Experiment 2. We based our reaction time  
153 analysis on correctly matched trials only (percent trials removed: Experiment 1a = 4.45%,  
154 Experiment 1b = 10.16%, Experiment 2 = 8.55%).

155 In our data analysis, we employed (generalized) linear mixed-effects models  
156 ((G)LMMs) using the lme4 package (Bates et al., 2015). We chose this approach because of  
157 its potential advantages over analysis of variance (ANOVA) as it allows us to simultaneously  
158 estimate by-participant and by-stimulus variance (Baayen et al., 2008; Bates et al., 2014; Kliegl  
159 et al., 2011). The random effects structure of each model was determined using a drop-one  
160 procedure starting with the full model including by-participant and by-stimulus varying  
161 intercepts and slopes for the main effects in our design. We then subsequently removed random  
162 slopes that did not contribute significantly to the goodness of fit as determined by likelihood  
163 ratio tests. This allowed us to avoid overparameterization and produce converging models that

164 are supported by the data. Details about the individual analysis and models are described in the  
165 Data Analyses sections of each experiment. For each GLMM we report  $\beta$  regression  
166 coefficients together with the  $z$  statistic and apply a two-tailed 5% error criterion for  
167 significance testing.  $P$ -values for the binary accuracy variable are based on asymptotic Wald  
168 tests. Additionally, reaction times were transformed following the Box-Cox procedure (Box &  
169 Cox, 1964) to correct for deviation from normality as to better meet LMM assumptions (see  
170 individual Data Analysis sections for further details). For the LMMs regression coefficients  
171 are reported with the  $t$ -statistic and  $p$ -values were calculated with the lmerTest package  
172 (Kuznetsova et al., 2017). We defined sum contrasts for match (match vs. mismatch), and  
173 consistency (consistent vs. inconsistent) where slope coefficients represent differences between  
174 factor levels and the intercept is equal to the grand mean.

175 We used the ggplot2 package (Wickham, 2016) for graphics and emmeans (Lenth,  
176 2022) for post-hoc comparisons. Data and code are openly available at  
177 [https://github.com/aylinsgl/2022-Viewpoint\\_and\\_Context](https://github.com/aylinsgl/2022-Viewpoint_and_Context).

## 178 **Apparatus**

179 All experimental sessions were carried out in the same six experimental cabins of the  
180 department of psychology at Goethe-University Frankfurt am Main, containing the same  
181 experimental set up (computers running OS Windows 10). Stimulus presentation, response-  
182 times (RT) and accuracy were systematically controlled and recorded by OpenSesame (Mathôt  
183 et al., 2012), presented on a 19-in monitor (resolution =  $1680 \times 1050$ , refresh rate = 60 Hz,  
184 viewing distance = approx. 65 cm, subtending approx.  $11.13^\circ \times 9.28^\circ$  of visual angle for the  
185 object images and approx.  $19^\circ \times 15.84^\circ$  of visual angle for the background images).

## 186 **Experiment 1a & 1b**

187 In Experiments 1a and 1b, we investigated the effect of viewpoint on object recognition  
188 RT and accuracy using 3D models of objects rotated around the pitch axis ( $0^\circ$ ,  $60^\circ$ ,  $120^\circ$ ,  $180^\circ$ ,

189 240°, 300°). The only difference between the experiments was that 3D models were presented  
190 either in color (Experiment 1a) or a grayscale version of the model was used (Experiment 1b).  
191 Participants had to indicate whether the object matched the previously presented basic level  
192 category label.

### 193 **Procedure**

194 Participants were presented with a fixation point in the middle of the screen followed  
195 by a basic level object category label (in German, font: Droid Sans Mono; font size: 26; color:  
196 black). This was followed by the target object presented in the middle of the screen, which  
197 could either match or mismatch the label, until the participant gave a response (Figure 1A).  
198 Participants were given feedback on screen if their answer was incorrect. The next trial  
199 automatically started with a new fixation point.

### 200 **Data Analysis**

201 After data preprocessing, we employed a binomial GLMM to examine the effects of  
202 viewpoint and match on accuracy. As fixed effects we included viewpoint (0°, 60°, 120°, 180°,  
203 240°, 300°) as a first and second-degree polynomial, the match vs mismatch comparison, and  
204 the interactions between these terms. The second-degree polynomial viewpoint term was added  
205 as we expected viewpoint to affect recognition in a non-linear manner (symmetry around 180°).  
206 Our final model included random intercepts for participants and stimuli, as well as a by-stimuli  
207 random slope for the match vs. mismatch effect for Experiment 1a, and random intercepts for  
208 participants and stimuli, as well as a by-stimuli and by-participant random slope for the match  
209 effect for Experiment 1b.

210 Based on the power coefficient output of the Box-Cox procedure ( $\lambda = 0.22$ ), RTs were  
211 log-transformed. We employed the same fixed effects structure for the RT-LMMs as for the  
212 accuracy-GLMMs. As random effects, we entered random intercepts for participants and

213 stimuli, as well as by-participant and by-stimuli random slopes for the effect of match for  
214 Experiment 1a and 1b.

## 215 **Results**

216 **Accuracy.** The average accuracy in Experiment 1a was quite high ( $M = 0.95$ ,  $SD =$   
217  $0.21$ ) and slightly lower in Experiment 1b ( $M = 0.9$ ,  $SD = 0.3$ ). In line with our hypothesis, the  
218 GLMM yielded a significant main effect for the second-degree polynomial viewpoint term in  
219 both experiments (Experiment 1a:  $\beta = 16.67$ ,  $SD = 5.61$ ,  $z = 2.97$ ,  $p = 0.003$ ; Experiment 1b:  $\beta$   
220  $= 18.82$ ,  $SE = 3.79$ ,  $z = 4.97$ ,  $p < 0.001$ ), meaning that the effect of viewpoint on accuracy can  
221 be well described by a quadratic function (Figure 2A and 2C). There was also a significant  
222 interaction between the second-degree polynomial of viewpoint and the match condition in  
223 both experiments, Experiment 1a:  $\beta = 23.62$ ,  $SE = 5.69$ ,  $z = 4.15$ ,  $p < 0.001$ ; Experiment 1b:  $\beta$   
224  $= 15.23$ ,  $SE = 3.82$ ,  $z = 3.98$ ,  $p < 0.001$ . Comparing the viewpoint trend for the match and  
225 mismatch conditions, we found that the second-degree viewpoint trend was significant in the  
226 match condition (Experiment 1a:  $\beta = 0.19$ ,  $SE = 0.03$ ,  $CI95\% = [0.13, 0.25]$ ; Experiment 1b:  $\beta$   
227  $= 0.16$ ,  $SE = 0.02$ ,  $CI95\% = [0.12, 0.21]$ ), but not in the mismatch condition, Experiment 1a:  $\beta$   
228  $= -0.03$ ,  $SE = 0.04$ ,  $CI95\% = [-0.12, 0.05]$ ; Experiment 1b:  $\beta = -0.02$ ,  $SE = 0.03$ ,  $CI95\% = [-$   
229  $0.04, 0.07]$ .

230 **Response-times (RT).** Participants were slightly faster on average in Experiment 1b  
231 ( $M = 685$  ms,  $SD = 358$  ms) than Experiment 1a ( $M = 738$  ms,  $SD = 299$  ms). In line with our  
232 hypothesis, the LMM revealed a significant main effect for the second-degree polynomial  
233 viewpoint term in both experiments, Experiment 1a:  $\beta = -2.2$ ,  $SE = 0.29$ ,  $t = -7.48$ ,  $p < 0.001$ ;  
234 Experiment 1b:  $\beta = -1.42$ ,  $SE = 0.29$ ,  $t = -4.99$ ,  $p < 0.001$  (Figure 2B and 2D). In both  
235 experiments there was no interaction between viewpoint and match, Experiment 1a:  $\beta = -0.12$ ,  
236  $SE = 0.29$ ,  $t = -0.4$ ,  $p = 0.69$ ; Experiment 1b:  $\beta = -0.38$ ,  $SE = 0.29$ ,  $t = -1.34$ ,  $p = 0.18$ .

237 **Figure 2.** Partial effect plots of the interactions of viewpoint (0°, 60°, 120°, 180°, 240°, 300°) and match (match vs. mismatch)  
238 on accuracy for Experiment 1a (coloured; A), and Experiment 1b (greyscaled; C), and the effect of viewpoint on RT for  
239 Experiment.

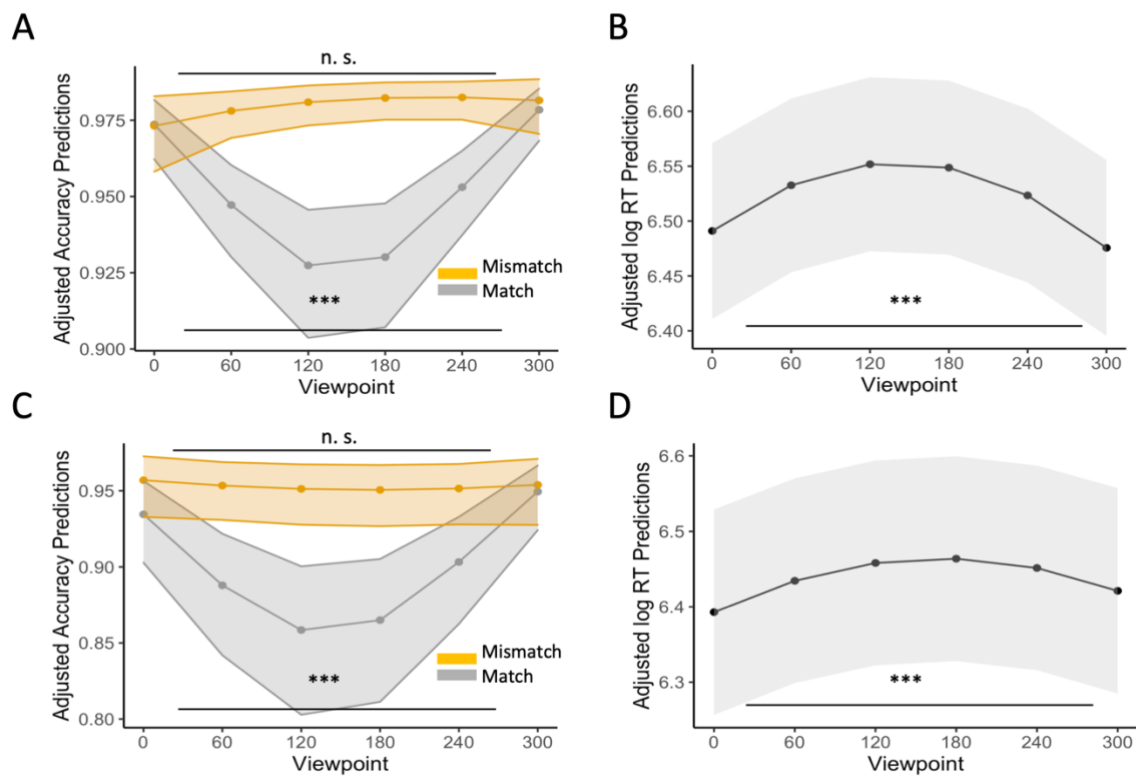

240

241

## Discussion

242 In Experiment 1a, we found viewpoint-dependent object recognition for objects rotated around  
243 the pitch axis. This effect can best be described by a quadratic curve that approximates  
244 symmetry around 120° rotation. We also found that in our sequential matching task, only the  
245 match condition produced viewpoint-dependent behavior, while mismatch trials seemed  
246 unaffected by viewpoint. Finding a mismatch might rely more on the analysis of global,  
247 viewpoint-invariant features, whereas matching might be more dependent on the analysis of  
248 local, viewpoint-dependent features (e.g., Jolicoeur, 1990a) (e.g., deciding a shape is not a car  
249 might require less viewpoint-dependent information than identifying the shape as a chair). In  
250 Experiment 1b, we were able to replicate our results from Experiment 1a. Grayscaleing the  
251 images seemed to have made the overall task slightly more difficult while still producing  
252 similarly viewpoint-dependent behavior. The canonical (0°) and non-canonical (120°)

253 viewpoints we used in Experiment 2 represented viewpoints that produced the best and worst  
254 recognition performance derived from average accuracy ratings obtained from Experiment 1a  
255 and 1b.

## 256 **Experiment 2**

257 In Experiment 2, we paired canonical (0°) and non-canonical (120°) viewpoints with  
258 consistent and inconsistent scene contexts. We were specifically interested in the interaction  
259 between viewpoint and consistency with the expectation that meaningful scene context  
260 information would reduce the effect of viewpoint on object recognition.

### 261 **Procedure**

262 In Experiment 2, we used the same word-picture verification task as in Experiments 1a  
263 and 1b (Figure 1B). Scene context was provided by first previewing the consistent or  
264 inconsistent scene for 300ms and then overlaying the target object on top of the scene  
265 background until a response was given.

### 266 **Data Analysis**

267 For both the accuracy-GLMM and response time (RT) LMM we entered interaction  
268 terms between viewpoint and consistency as fixed effects. The GLMM included random  
269 intercepts for participants and stimuli, as well as a by-stimuli random slope for the effect of  
270 viewpoint. Response time data was log transformed.

271 For the RT-LMM we had random intercepts for participants and stimuli, and a by-  
272 participant random slope for the effect of viewpoint and by-stimuli random slopes for the  
273 effects of viewpoint and consistency.

### 274 **Results**

275 **Accuracy.** Accuracy was significantly higher for canonical viewpoints than for non-  
276 canonical viewpoints as revealed by the GLMM ( $\beta = 0.68$ ,  $SE = 0.14$ ,  $z = 4.82$ ,  $p < 0.001$ ) but  
277 there was no significant main effect for consistency,  $\beta = 0.06$ ,  $SE = 0.07$ ,  $z = 0.75$ ,  $p = 0.45$ .

278 Critically, there was a significant interaction between viewpoint and consistency,  $\beta = -0.21$ ,  $SE$   
279  $= 0.07$ ,  $z = -2.84$ ,  $p = 0.004$  (Figure 3A). Post-hoc interaction contrasts revealed that the  
280 viewpoint-dependence effect was significantly stronger in the inconsistent scene condition  
281 compared to the consistent scene condition,  $\beta = -0.84$ ,  $SE = 0.3$ ,  $z = -2.84$ ,  $p = 0.005$ . This is in  
282 line with our hypothesis that providing meaningful scene context can reduce the effects of  
283 viewpoint on object recognition. Additionally, the scene-consistency effect was only  
284 significant in the non-canonical condition ( $\beta = 0.53$ ,  $SE = 0.15$ ,  $z = 3.45$ ,  $p < 0.001$ ), but not in  
285 the canonical condition,  $\beta = -0.31$ ,  $SE = 0.25$ ,  $z = -1.22$ ,  $p = 0.22$ .

286 **Response-Times (RT).** The LMM yielded a significant main effect for viewpoint ( $\beta =$   
287  $-0.07$ ,  $SE = 0.01$ ,  $t = -7.26$ ,  $p < 0.001$ ), where RTs were faster for canonical ( $M = 558$ ms,  $SD =$   
288  $255$ ms) than for non-canonical viewpoints ( $M = 645$  ms,  $SD = 333$  ms) (Figure 3B). There was  
289 no significant interaction between viewpoint and consistency,  $\beta = 0.004$ ,  $SE = 0.005$ ,  $t = 0.83$ ,  
290  $p = 0.41$ .

291 **Figure 3.** Experiment 2 accuracy difference scores per participant (canonical vs. non-canonical) for consistent and  
292 inconsistent scene backgrounds (A). Adjusted response times (B) were obtained with the remef package (Hohenstein &  
293 Kliegl, 2021). \* $p < .05$ . \*\*\* $p < .001$ .

294

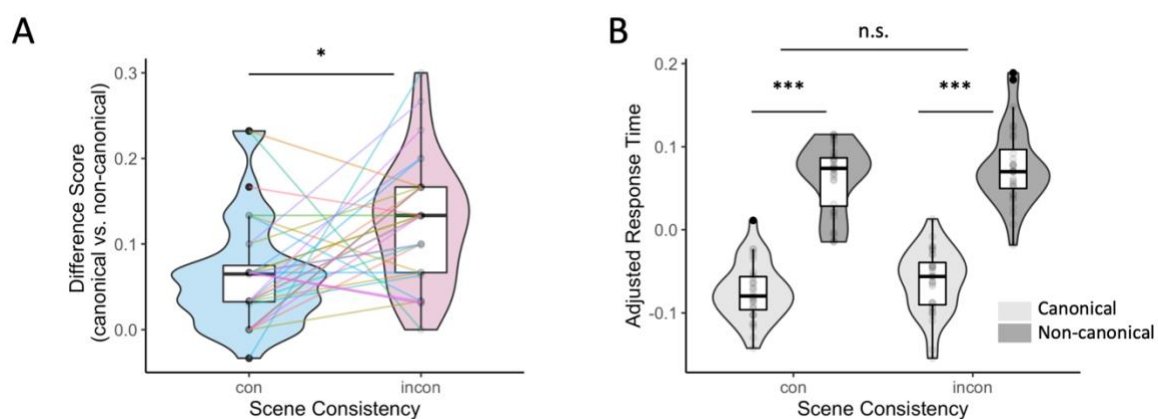

295

## 296 Discussion

297 In general, object recognition accuracy was viewpoint dependent, however, there was  
298 a significant interaction between viewpoint and consistency. In line with our hypothesis, the

299 viewpoint effect was significantly weaker for consistent scenes and the scene consistency effect  
300 was only observed for non-canonical viewpoints (Figure 3A). Non-canonical viewpoints were  
301 recognized significantly slower than canonical viewpoints. However, this was unaffected by  
302 scene consistency.

### 303 **General Discussion**

304 In the present study, we investigated how scene context information modulates  
305 viewpoint-dependent object recognition using 3D models of everyday objects. While providing  
306 meaningful context did not eradicate the viewpoint effect fully, it significantly reduced  
307 recognition accuracy costs. In line with previous findings (Sastuin et al., 2015) this supports a  
308 model of object recognition that incorporates context (e.g., Bar, 2004) while dynamically  
309 adapting to the amount of available information based not only on visual features of the object  
310 (Burgund & Marsolek, 2000; Hayward & Tarr, 1997; Jolicoeur, 1990), but also context. It  
311 further motivates models of object constancy - the visual system's ability to produce  
312 representations that are robust to changes in e.g., viewpoint or lighting (e.g., DiCarlo & Cox,  
313 2007) – that efficiently integrate contextual information and can lead to both viewpoint-  
314 dependent and invariant behavior based on available information and the task at hand.

315 A key component of the present study was to generalize previous findings on object-  
316 scene processing effects and viewpoint-dependence to depth rotated 3D objects. We want to  
317 highlight the importance of generalizing findings from traditional 2D settings to more  
318 naturalistic settings and stimuli. Kristjánsson and Draschkow., (2021) have shown very  
319 illustratively for a variety of phenomena that given more naturalistic constraints, a system is  
320 able to circumvent e.g., capacity limits by drawing on the rich visual experience of natural  
321 environments. While we did not use fully immersive environments, using 3D models offers a  
322 more realistic encounter of everyday objects and therefore a more precise measure of  
323 viewpoint-dependence in real-world object recognition. It should be noted, however, that there



324 is a trade-off between naturalistic *looking* stimuli (i.e., photographs) and stimuli that more  
325 precisely capture naturalistic properties (i.e., 3D structure of objects from different viewpoints)  
326 in a highly controlled manner while not *looking* as naturalistic. Here, we opted for providing  
327 more naturalistic 3D properties of the displayed objects.

328         From the present study it is unclear what kind of information contained in the scenes  
329 was responsible for reducing the viewpoint costs. Rapidly accessed global information such as  
330 the gist of the scene (Oliva & Torralba, 2007) could be the main factor. At the same time, more  
331 local information such as the detection and recognition of certain objects in the scene preview  
332 could provide information about related possible target objects based on internalized scene-  
333 object and object-object regularities (Võ et al., 2019). Revealing the time course of when what  
334 kind of contextual information is integrated to buffer viewpoint effects would provide new  
335 insights into how the visual system so effortlessly achieves invariant object recognition.

336         Varying what information is presented during the task (i.e., providing meaningful  
337 context vs. showing objects in isolation) is one way to probe the visual system's ability to  
338 overcome processing limitations in viewpoint-dependent object recognition. Alternatively, one  
339 could keep the visual input constant but vary the level at which participants have to perform  
340 the matching task (Hamm & McMullen, 1998). If there are object representations that contain  
341 more or less viewpoint-dependent or invariant information how does this interact with the  
342 integration of contextual information in the form of scene context?

343         Finally, we would like to address that on average performance was high in the matching  
344 task throughout all our experiments. These ceiling effects are probably due to the type of task  
345 we chose - different from the tasks usually employed to study scene consistency effects  
346 (Davenport & Potter, 2004; Sastyn et al., 2015). Despite these differences in difficulty, we  
347 were able to demonstrate a significant reduction in viewpoint costs by providing meaningful  
348 scene context.

349           Past research has made strong advances towards understanding the computations that  
350   underly invariant object recognition (DiCarlo & Cox, 2007). Understanding these mechanisms  
351   in isolation is key to understanding object recognition in general. We argue that understanding  
352   how the visual system is able to make use of richly structured naturalistic environments to  
353   circumvent computational bottlenecks will ultimately lead to better, more robust models of  
354   object recognition and inspire approaches in fields such as computer vision (e.g., Bomatter et  
355   al., 2021).

356           To conclude, in the present study we built upon previous findings on object-scene  
357   processing and viewpoint dependence by generalizing these effects to depth rotated 3D objects.  
358   We highlight the importance of testing capacity limits of object recognition in more naturalistic  
359   frameworks in order to build more robust and flexible models and move towards a better  
360   understanding of vision under naturalistic constraints.

361

## References

- Baayen, R. H., Davidson, D. J., & Bates, D. M. (2008). Mixed-effects modeling with crossed random effects for subjects and items. *Journal of Memory and Language*, 59(4), 390–412. <https://doi.org/10.1016/j.jml.2007.12.005>
- Bar, M. (2004). Visual objects in context. *Nature Reviews Neuroscience*, 5(8), Article 8. <https://doi.org/10.1038/nrn1476>
- Bates, D., Mächler, M., Bolker, B., & Walker, S. (2015). Fitting Linear Mixed Effects Models Using lme4. *Journal of Statistical Software*, 67(1), 1-48. doi:10.18637/jss.v067.i01.
- Biederman, I., & Gerhardstein, P. C. (1993). Recognizing depth-rotated objects: Evidence and conditions for three-dimensional viewpoint invariance. *Journal of Experimental Psychology: Human Perception and Performance*, 19(6), 1162–1182. <https://doi.org/10.1037/0096-1523.19.6.1162>
- Biederman, I., Mezzanotte, R. J., & Rabinowitz, J. C. (1982). Scene perception: Detecting and judging objects undergoing relational violations. *Cognitive Psychology*, 14(2), 143–177. [https://doi.org/10.1016/0010-0285\(82\)90007-X](https://doi.org/10.1016/0010-0285(82)90007-X)
- Bomatter, P., Zhang, M., Karev, D., Madan, S., Tseng, C., & Kreiman, G. (2021). *When Pigs Fly: Contextual Reasoning in Synthetic and Natural Scenes*. 255–264. [https://openaccess.thecvf.com/content/ICCV2021/html/Bomatter\\_When\\_Pigs\\_Fly\\_Contextual\\_Reasoning\\_in\\_Synthetic\\_and\\_Natural\\_Scenes\\_ICCV\\_2021\\_paper.html](https://openaccess.thecvf.com/content/ICCV2021/html/Bomatter_When_Pigs_Fly_Contextual_Reasoning_in_Synthetic_and_Natural_Scenes_ICCV_2021_paper.html)
- Box, G. E. P., & Cox, D. R. (1964). An Analysis of Transformations. *Journal of the Royal Statistical Society: Series B (Methodological)*, 26(2), 211–243. <https://doi.org/10.1111/j.2517-6161.1964.tb00553.x>

- Brandman, T., & Peelen, M. V. (2017). Interaction between Scene and Object Processing Revealed by Human fMRI and MEG Decoding. *Journal of Neuroscience*, *37*(32), 7700–7710. <https://doi.org/10.1523/JNEUROSCI.0582-17.2017>
- Bülthoff, H. H., & Edelman, S. (1992). Psychophysical support for a two-dimensional view interpolation theory of object recognition. *Proceedings of the National Academy of Sciences*, *89*(1), 60–64. <https://doi.org/10.1073/pnas.89.1.60>
- Burgund, E. D., & Marsolek, C. J. (2000). Viewpoint-invariant and viewpoint-dependent object recognition in dissociable neural subsystems. *Psychonomic Bulletin & Review*, *7*(3), 480–489. <https://doi.org/10.3758/BF03214360>
- Charles Leek, E., & Johnston, S. J. (2006). A polarity effect in misoriented object recognition: The role of polar features in the computation of orientation-invariant shape representations. *Visual Cognition*, *13*(5), 573–600. <https://doi.org/10.1080/13506280544000048>
- Davenport, J. L., & Potter, M. C. (2004). Scene Consistency in Object and Background Perception. *Psychological Science*, *15*(8), 559–564. <https://doi.org/10.1111/j.0956-7976.2004.00719.x>
- DiCarlo, J. J., & Cox, D. D. (2007). Untangling invariant object recognition. *Trends in Cognitive Sciences*, *11*(8), 333–341. <https://doi.org/10.1016/j.tics.2007.06.010>
- Draschkow, D. (2022). Remote virtual reality as a tool for increasing external validity. *Nature Reviews Psychology*, *1*(8), Article 8. <https://doi.org/10.1038/s44159-022-00082-8>
- Draschkow, D., Kallmayer, M., & Nobre, A. C. (2021). When Natural Behavior Engages Working Memory. *Current Biology*, *31*(4), 869-874.e5. <https://doi.org/10.1016/j.cub.2020.11.013>

- Draschkow, D., & Võ, M. L.-H. (2017). Scene grammar shapes the way we interact with objects, strengthens memories, and speeds search. *Scientific Reports*, 7(1), Article 1. <https://doi.org/10.1038/s41598-017-16739-x>
- Edelman, S. (1995). Class similarity and viewpoint invariance in the recognition of 3D objects. *Biological Cybernetics*, 72(3), 207–220. <https://doi.org/10.1007/BF00201485>
- Foster, D. H., & Gilson, S. J. (2002). Recognizing novel three-dimensional objects by summing signals from parts and views. *Proceedings of the Royal Society of London. Series B: Biological Sciences*, 269(1503), 1939–1947. <https://doi.org/10.1098/rspb.2002.2119>
- Gauthier, I., Hayward, W. G., Tarr, M. J., Anderson, A. W., Skudlarski, P., & Gore, J. C. (2002). BOLD Activity during Mental Rotation and Viewpoint-Dependent Object Recognition. *Neuron*, 34(1), 161–171. [https://doi.org/10.1016/S0896-6273\(02\)00622-0](https://doi.org/10.1016/S0896-6273(02)00622-0)
- Graf, M. (2006). Coordinate transformations in object recognition. *Psychological Bulletin*, 132(6), 920–945. <https://doi.org/10.1037/0033-2909.132.6.920>
- Hamm, J. P., & McMullen, P. A. (1998). Effects of orientation on the identification of rotated objects depend on the level of identity. *Journal of Experimental Psychology: Human Perception and Performance*, 24(2), 413–426. <https://doi.org/10.1037/0096-1523.24.2.413>
- Hayward, W. G. (2003). After the viewpoint debate: Where next in object recognition? *Trends in Cognitive Sciences*, 7(10), 425–427. <https://doi.org/10.1016/j.tics.2003.08.004>
- Hayward, W. G., & Tarr, M. J. (1997). Testing conditions for viewpoint invariance in object recognition. *Journal of Experimental Psychology: Human Perception and Performance*, 23(5), 1511–1521. <https://doi.org/10.1037/0096-1523.23.5.1511>

Hayward, W. G., & Williams, P. (2000). Viewpoint Dependence and Object Discriminability.

*Psychological Science*, 11(1), 7–12. <https://doi.org/10.1111/1467-9280.00207>

Helbing, J., Draschkow, D., & L.-H. Vö, M. (2022). Auxiliary Scene-Context Information

Provided by Anchor Objects Guides Attention and Locomotion in Natural Search

Behavior. *Psychological Science*, 33(9), 1463–1476.

<https://doi.org/10.1177/09567976221091838>

Helbing, J., Draschkow, D., & Vö, M. L.-H. (2020). Search superiority: Goal-directed

attentional allocation creates more reliable incidental identity and location memory than

explicit encoding in naturalistic virtual environments. *Cognition*, 196, 104147.

<https://doi.org/10.1016/j.cognition.2019.104147>

Jolicoeur, P. (1990). Identification of Disoriented Objects: A Dual-systems Theory. *Mind &*

*Language*, 5(4), 387–410. <https://doi.org/10.1111/j.1468-0017.1990.tb00170.x>

Josephs, E. L., Draschkow, D., Wolfe, J. M., & Vö, M. L.-H. (2016). Gist in time: Scene

semantics and structure enhance recall of searched objects. *Acta Psychologica*, 169,

100–108. <https://doi.org/10.1016/j.actpsy.2016.05.013>

Kliegl, R., Wei, P., Dambacher, M., Yan, M., & Zhou, X. (2011). Experimental Effects and

Individual Differences in Linear Mixed Models: Estimating the Relationship between

Spatial, Object, and Attraction Effects in Visual Attention. *Frontiers in Psychology*, 1.

<https://www.frontiersin.org/article/10.3389/fpsyg.2010.00238>

Kristjánsson, Á., & Draschkow, D. (2021). Keeping it real: Looking beyond capacity limits in

visual cognition. *Attention, Perception, & Psychophysics*, 83(4), 1375–1390.

<https://doi.org/10.3758/s13414-021-02256-7>

Kuznetsova, A., Brockhoff, P.B., Christensen, R.H.B., (2017). lmerTest Package: Tests in

Linear Mixed Effects Models. *Journal of Statistical Software*, 82(13), 1-26. doi:

0.18637/jss.v082.i13 (URL: <https://doi.org/10.18637/jss.v082.i13>).

- Lauer, T., Schmidt, F., & Võ, M. L.-H. (2021). The role of contextual materials in object recognition. *Scientific Reports*, *11*(1), Article 1. <https://doi.org/10.1038/s41598-021-01406-z>
- Leek, E. C., Atherton, C. J., & Thierry, G. (2007). Computational mechanisms of object constancy for visual recognition revealed by event-related potentials. *Vision Research*, *47*(5), 706–713. <https://doi.org/10.1016/j.visres.2006.10.021>
- Lenth, R.V., (2022). emmeans: Estimated Marginal Means, aka Least-Squares Means. R package version 1.7.2. <https://CRAN.R-project.org/package=emmeans>
- Logothetis, N. K., Pauls, J., Bülthoff, H. H., & Poggio, T. (1994). View-dependent object recognition by monkeys. *Current Biology*, *4*(5), 401–414. [https://doi.org/10.1016/S0960-9822\(00\)00089-0](https://doi.org/10.1016/S0960-9822(00)00089-0)
- Lowe, D. G. (1987). Three-dimensional object recognition from single two-dimensional images. *Artificial Intelligence*, *31*(3), 355–395. [https://doi.org/10.1016/0004-3702\(87\)90070-1](https://doi.org/10.1016/0004-3702(87)90070-1)
- Marr, D., Nishihara, H. K., & Brenner, S. (1978). Representation and recognition of the spatial organization of three-dimensional shapes. *Proceedings of the Royal Society of London. Series B. Biological Sciences*, *200*(1140), 269–294. <https://doi.org/10.1098/rspb.1978.0020>
- Mathôt, S., Schreij, D., & Theeuwes, J. (2012). OpenSesame: An open-source, graphical experiment builder for the social sciences. *Behavior Research Methods*, *44*(2), 314–324. <https://doi.org/10.3758/s13428-011-0168-7>
- Öhlschläger, S., & Võ, M. L.-H. (2017). SCEGRAM: An image database for semantic and syntactic inconsistencies in scenes. *Behavior Research Methods*, *49*(5), 1780–1791. <https://doi.org/10.3758/s13428-016-0820-3>

- Oliva, A., & Torralba, A. (2007). The role of context in object recognition. *Trends in Cognitive Sciences*, 11(12), 520–527. <https://doi.org/10.1016/j.tics.2007.09.009>
- Palmer, tephem E. (1975). The effects of contextual scenes on the identification of objects. *Memory & Cognition*, 3(5), 519–526. <https://doi.org/10.3758/BF03197524>
- Poggio, T., & Edelman, S. (1990). A network that learns to recognize three-dimensional objects. *Nature*, 343(6255), Article 6255. <https://doi.org/10.1038/343263a0>
- R Core Team (2021). R: A language and environment for statistical computing. *R Foundation for Statistical Computing*, Vienna, Austria. URL <https://www.R-project.org/>.
- Ratan Murty, N. A., & Arun, S. P. (2015). Dynamics of 3D view invariance in monkey inferotemporal cortex. *Journal of Neurophysiology*, 113(7), 2180–2194. <https://doi.org/10.1152/jn.00810.2014>
- Sastyn, G., Niimi, R., & Yokosawa, K. (2015). Does object view influence the scene consistency effect? *Attention, Perception, & Psychophysics*, 77(3), 856–866. <https://doi.org/10.3758/s13414-014-0817-x>
- Stankiewicz, B. J. (2002). Empirical evidence for independent dimensions in the visual representation of three-dimensional shape. *Journal of Experimental Psychology: Human Perception and Performance*, 28(4), 913–932. <https://doi.org/10.1037/0096-1523.28.4.913>
- Tarr, M. J., & Bülthoff, H. H. (1995). Is human object recognition better described by geon structural descriptions or by multiple views? Comment on Biederman and Gerhardstein (1993). *Journal of Experimental Psychology: Human Perception and Performance*, 21(6), 1494–1505. <https://doi.org/10.1037/0096-1523.21.6.1494>
- Tarr, M. J., & Pinker, S. (1989). Mental rotation and orientation-dependence in shape recognition. *Cognitive Psychology*, 21(2), 233–282. [https://doi.org/10.1016/0010-0285\(89\)90009-1](https://doi.org/10.1016/0010-0285(89)90009-1)



- Vanrie, J., Béatse, E., Wagemans, J., Sunaert, S., & Van Hecke, P. (2002). Mental rotation versus invariant features in object perception from different viewpoints: An fMRI study. *Neuropsychologia*, 40(7), 917–930. [https://doi.org/10.1016/S0028-3932\(01\)00161-0](https://doi.org/10.1016/S0028-3932(01)00161-0)
- Võ, M. L.-H. (2021). The meaning and structure of scenes. *Vision Research*, 181, 10–20. <https://doi.org/10.1016/j.visres.2020.11.003>
- Võ, M. L.-H., Boettcher, S. E., & Draschkow, D. (2019). Reading scenes: How scene grammar guides attention and aids perception in real-world environments. *Current Opinion in Psychology*, 29, 205–210. <https://doi.org/10.1016/j.copsyc.2019.03.009>
- Võ, M. L.-H., & Henderson, J. M. (2009). Does gravity matter? Effects of semantic and syntactic inconsistencies on the allocation of attention during scene perception. *Journal of Vision*, 9(3), 24. <https://doi.org/10.1167/9.3.24>
- Võ, M. L.-H., & Wolfe, J. M. (2013a). The interplay of episodic and semantic memory in guiding repeated search in scenes. *Cognition*, 126(2), 198–212. <https://doi.org/10.1016/j.cognition.2012.09.017>
- Võ, M. L.-H., & Wolfe, J. M. (2013b). Differential Electrophysiological Signatures of Semantic and Syntactic Scene Processing. *Psychological Science*, 24(9), 1816–1823. <https://doi.org/10.1177/0956797613476955>
- Wickham, H., (2016). *ggplot2: Elegant Graphics for Data Analysis*. Springer-Verlag New York, 2016.
- Wilson, K. D., & Farah, M. J. (2003). When does the visual system use viewpoint-invariant representations during recognition? *Cognitive Brain Research*, 16(3), 399–415. [https://doi.org/10.1016/S0926-6410\(03\)00054-5](https://doi.org/10.1016/S0926-6410(03)00054-5)

Zisserman, A., Forsyth, D., Mundy, J., Rothwell, C., Liu, J., & Pillow, N. (1995). 3D object recognition using invariance. *Artificial Intelligence*, 78(1), 239–288.

[https://doi.org/10.1016/0004-3702\(95\)00023-2](https://doi.org/10.1016/0004-3702(95)00023-2)

### **Acknowledgements:**

This work was funded by the Deutsche Forschungsgemeinschaft (DFG, German Research Foundation)—project number 222641018—SFB/TRR 135, sub-project C7 to M.L.-H.V., and by the Main-Campus-doctus scholarship of the Stiftung Polytechnische Gesellschaft Frankfurt a. M. to A.K.

The Wellcome Centre for Integrative Neuroimaging is supported by core funding from the Wellcome Trust (203139/Z/16/Z). The work is supported by the NIHR Oxford Health Biomedical Research Centre. The funders had no role in the decision to publish or in the preparation of the manuscript.
